# Supplementary material
Source: MDPI journal article supplement (https://www.mdpi.com/2072-4292/14/11/2590)
Supplement: s1 [file s1]

**Table S1** Morphometric parameters and locations of the 272 cones measured in this study

| ID | Lon (E)  | Lat (N) | Wcr (m) | Wco (m) | Hco (m) |
|----|----------|---------|---------|---------|---------|
| 1  | 109.6789 | 23.7525 | 296.1   | 648.7   | 31.0    |
| 2  | 109.6378 | 23.6753 | 87.1    | 306.9   | 25.0    |
| 3  | 109.6445 | 23.6806 | 101.6   | 306.9   | 30.0    |
| 4  | 109.6499 | 23.4730 | 145.6   | 276.0   | 17.8    |
| 5  | 109.6594 | 23.4710 | 166.6   | 309.3   | 10.5    |
| 6  | 109.7001 | 23.4222 | 155.0   | 348.8   | 25.5    |
| 7  | 109.6838 | 23.4221 | 109.0   | 191.7   | 17.3    |
| 8  | 109.7983 | 23.4045 | 201.4   | 425.6   | 39.5    |
| 9  | 110.2160 | 23.8239 | 197.1   | 430.2   | 37.5    |
| 10 | 110.3522 | 23.7919 | 211.0   | 505.3   | 43.7    |
| 11 | 110.3513 | 23.7396 | 189.0   | 457.3   | 24.1    |
| 12 | 110.3907 | 23.6801 | 225.2   | 545.9   | 29.0    |
| 13 | 110.4279 | 23.6324 | 114.5   | 326.8   | 30.5    |
| 14 | 110.4304 | 23.6271 | 165.1   | 297.9   | 29.2    |
| 15 | 110.4459 | 23.7928 | 248.0   | 471.4   | 15.7    |
| 16 | 110.4066 | 23.7789 | 243.4   | 412.6   | 25.0    |
| 17 | 110.4168 | 23.7816 | 134.6   | 387.5   | 47.7    |
| 18 | 110.4300 | 23.7789 | 301.2   | 504.9   | 35.0    |
| 19 | 110.4257 | 23.7728 | 160.0   | 326.3   | 35.0    |
| 20 | 110.4363 | 23.7654 | 268.8   | 497.6   | 37.7    |
| 21 | 110.4506 | 23.7740 | 352.6   | 574.1   | 31.8    |
| 22 | 110.4468 | 23.8075 | 313.3   | 576.0   | 35.0    |
| 23 | 110.5587 | 23.7985 | 150.8   | 408.2   | 31.5    |
| 24 | 110.6028 | 23.8063 | 176.2   | 471.6   | 41.0    |
| 25 | 110.5893 | 23.7273 | 221.6   | 463.8   | 30.0    |
| 26 | 110.4823 | 23.6327 | 259.5   | 525.7   | 30.8    |
| 27 | 110.4725 | 23.6078 | 348.6   | 675.8   | 23.5    |
| 28 | 110.5848 | 23.6650 | 187.1   | 497.4   | 32.3    |
| 29 | 110.6626 | 23.6391 | 180.2   | 456.1   | 50.3    |
| 30 | 110.6160 | 23.6068 | 157.5   | 314.7   | 36.6    |
| 31 | 110.6586 | 23.6564 | 176.2   | 550.1   | 73.5    |
| 32 | 110.5064 | 23.3712 | 218.9   | 434.2   | 18.5    |
| 33 | 110.5119 | 23.3793 | 286.1   | 513.0   | 27.0    |
| 34 | 110.5157 | 23.3861 | 249.1   | 479.9   | 24.0    |
| 35 | 110.6009 | 23.3850 | 384.2   | 616.4   | 21.3    |
| 36 | 110.6430 | 23.4335 | 687.9   | 1206.6  | 33.3    |
| 37 | 110.6786 | 23.5070 | 362.0   | 699.4   | 26.4    |
| 38 | 110.7307 | 23.5184 | 94.7    | 193.1   | 19.9    |
| 39 | 110.7320 | 23.7299 | 113.6   | 206.6   | 16.4    |
| 40 | 110.7421 | 23.7780 | 195.2   | 385.3   | 36.8    |
| 41 | 110.7468 | 23.7807 | 288.9   | 596.9   | 42.0    |
| 42 | 110.8159 | 23.8206 | 227.9   | 487.2   | 37.3    |

|    |          |         |       |       |      |
|----|----------|---------|-------|-------|------|
| 43 | 110.8299 | 23.8284 | 255.5 | 449.6 | 28.5 |
| 44 | 110.8383 | 23.8213 | 93.9  | 266.2 | 31.0 |
| 45 | 110.8367 | 23.8093 | 201.5 | 336.0 | 31.3 |
| 46 | 110.8466 | 23.8076 | 160.9 | 309.6 | 26.4 |
| 47 | 110.8471 | 23.8278 | 92.9  | 283.6 | 32.0 |
| 48 | 110.8450 | 23.8360 | 134.7 | 326.6 | 48.0 |
| 49 | 110.7694 | 23.8267 | 317.6 | 669.4 | 38.0 |
| 50 | 110.9854 | 23.7866 | 129.1 | 243.4 | 21.0 |
| 51 | 110.9574 | 23.7307 | 247.0 | 484.7 | 38.5 |
| 52 | 110.9897 | 23.7263 | 252.6 | 457.7 | 27.0 |
| 53 | 110.9656 | 23.7388 | 222.2 | 457.1 | 34.0 |
| 54 | 110.9790 | 23.7311 | 497.2 | 707.7 | 32.0 |
| 55 | 110.9701 | 23.6708 | 180.2 | 336.5 | 18.8 |
| 56 | 110.9849 | 23.6666 | 300.1 | 538.8 | 38.5 |
| 57 | 110.8141 | 23.5828 | 241.3 | 541.8 | 35.3 |
| 58 | 110.8220 | 23.5494 | 241.5 | 515.1 | 26.5 |
| 59 | 110.8475 | 23.5591 | 164.3 | 422.3 | 21.6 |
| 60 | 110.7440 | 23.4332 | 289.8 | 544.7 | 24.0 |
| 61 | 110.8188 | 23.4577 | 231.4 | 347.2 | 17.5 |
| 62 | 110.8173 | 23.4883 | 130.9 | 256.4 | 20.3 |
| 63 | 110.8342 | 23.3613 | 350.3 | 683.5 | 35.5 |
| 64 | 110.9344 | 23.4920 | 218.5 | 405.9 | 28.0 |
| 65 | 110.9373 | 23.4415 | 214.2 | 427.5 | 27.5 |
| 66 | 110.9419 | 23.4386 | 350.2 | 482.7 | 22.0 |
| 67 | 110.9598 | 23.5576 | 262.5 | 496.2 | 21.3 |
| 68 | 110.9827 | 23.5678 | 269.4 | 516.8 | 22.7 |
| 69 | 110.9780 | 23.5215 | 201.9 | 345.1 | 17.0 |
| 70 | 110.9374 | 23.5330 | 320.0 | 511.3 | 18.0 |
| 71 | 110.8631 | 23.8369 | 503.7 | 709.2 | 25.3 |
| 72 | 109.7221 | 24.2649 | 238.1 | 487.3 | 37.5 |
| 73 | 109.7208 | 24.2482 | 159.2 | 412.5 | 47.0 |
| 74 | 109.6649 | 24.2097 | 75.1  | 215.9 | 26.0 |
| 75 | 109.7294 | 24.2835 | 301.7 | 507.7 | 30.0 |
| 76 | 109.7527 | 24.2821 | 381.0 | 578.9 | 41.0 |
| 77 | 109.8326 | 24.3055 | 173.9 | 389.0 | 37.3 |
| 78 | 109.8887 | 24.3102 | 149.8 | 348.1 | 31.0 |
| 79 | 109.8555 | 24.1754 | 319.6 | 554.6 | 43.7 |
| 80 | 109.8723 | 23.9592 | 199.9 | 390.7 | 36.5 |
| 81 | 109.7253 | 24.2378 | 140.6 | 285.6 | 27.7 |
| 82 | 109.9360 | 24.1305 | 238.1 | 391.8 | 27.3 |
| 83 | 109.9566 | 24.1063 | 239.1 | 447.9 | 31.5 |
| 84 | 110.0978 | 24.0668 | 79.3  | 191.7 | 17.4 |
| 85 | 110.2884 | 24.4121 | 210.0 | 429.9 | 23.7 |
| 86 | 110.3156 | 24.4252 | 265.7 | 415.4 | 26.7 |

|     |          |         |       |       |      |
|-----|----------|---------|-------|-------|------|
| 87  | 110.3006 | 24.3022 | 199.1 | 351.3 | 21.8 |
| 88  | 110.2258 | 23.9955 | 177.2 | 304.1 | 28.0 |
| 89  | 110.3256 | 24.1342 | 184.2 | 420.1 | 34.3 |
| 90  | 110.3315 | 24.2723 | 202.0 | 414.2 | 29.0 |
| 91  | 110.3397 | 24.2584 | 169.1 | 356.3 | 32.8 |
| 92  | 110.3242 | 24.2677 | 122.6 | 227.6 | 32.0 |
| 93  | 110.2927 | 23.8654 | 221.0 | 450.4 | 34.8 |
| 94  | 110.5903 | 24.3475 | 336.8 | 732.6 | 48.5 |
| 95  | 110.6471 | 24.1692 | 352.2 | 725.3 | 43.8 |
| 96  | 110.7078 | 24.0872 | 246.9 | 593.7 | 62.3 |
| 97  | 110.6976 | 24.0365 | 305.8 | 578.2 | 48.0 |
| 98  | 110.7073 | 24.0356 | 251.7 | 496.7 | 38.0 |
| 99  | 110.6494 | 23.9890 | 350.2 | 642.8 | 44.8 |
| 100 | 110.7065 | 23.9801 | 189.5 | 340.8 | 17.3 |
| 101 | 110.6924 | 23.9795 | 152.6 | 314.5 | 23.3 |
| 102 | 110.7024 | 23.9091 | 292.2 | 621.2 | 37.8 |
| 103 | 110.7023 | 23.8726 | 130.9 | 327.9 | 23.0 |
| 104 | 110.4906 | 23.9205 | 259.4 | 433.0 | 18.0 |
| 105 | 110.4965 | 23.8940 | 205.7 | 332.9 | 20.3 |
| 106 | 110.5444 | 23.8967 | 299.5 | 607.7 | 39.8 |
| 107 | 110.5654 | 23.8474 | 355.5 | 707.8 | 31.3 |
| 108 | 110.9062 | 24.4606 | 216.2 | 495.4 | 47.0 |
| 109 | 110.9175 | 24.4491 | 142.0 | 438.0 | 42.8 |
| 110 | 110.9354 | 24.4321 | 296.7 | 698.8 | 63.8 |
| 111 | 110.8795 | 24.3817 | 285.2 | 653.8 | 50.0 |
| 112 | 110.9555 | 24.1968 | 157.2 | 301.2 | 17.0 |
| 113 | 110.9557 | 24.0777 | 240.2 | 614.1 | 42.8 |
| 114 | 110.7934 | 23.8505 | 292.0 | 561.3 | 22.5 |
| 115 | 110.9787 | 23.9697 | 235.0 | 393.3 | 19.8 |
| 116 | 109.6882 | 24.9369 | 182.0 | 390.4 | 36.8 |
| 117 | 109.7184 | 24.8624 | 261.9 | 582.1 | 63.3 |
| 118 | 109.6840 | 24.8212 | 444.9 | 598.9 | 38.3 |
| 119 | 109.6968 | 24.8214 | 240.1 | 386.1 | 40.0 |
| 120 | 109.6752 | 24.7989 | 216.6 | 406.9 | 25.3 |
| 121 | 109.6837 | 24.8019 | 207.0 | 368.6 | 36.7 |
| 122 | 109.6891 | 24.8041 | 167.6 | 330.3 | 33.5 |
| 123 | 109.7009 | 24.8163 | 276.2 | 437.7 | 14.5 |
| 124 | 109.7076 | 24.8161 | 285.6 | 538.0 | 37.0 |
| 125 | 109.7103 | 24.8078 | 146.8 | 329.1 | 31.3 |
| 126 | 109.7202 | 24.8233 | 105.1 | 269.3 | 31.0 |
| 127 | 109.7034 | 24.7852 | 93.9  | 235.0 | 24.1 |
| 128 | 109.6948 | 24.7623 | 217.9 | 518.2 | 56.8 |
| 129 | 109.6639 | 24.7334 | 161.6 | 445.5 | 56.0 |
| 130 | 109.7390 | 24.7699 | 215.0 | 426.2 | 24.0 |

|     |          |         |       |       |      |
|-----|----------|---------|-------|-------|------|
| 131 | 109.7552 | 24.7653 | 92.1  | 234.4 | 19.8 |
| 132 | 109.7394 | 24.7418 | 219.8 | 344.3 | 30.0 |
| 133 | 109.7493 | 24.7478 | 136.1 | 281.2 | 28.5 |
| 134 | 109.7598 | 24.7462 | 126.0 | 285.3 | 28.8 |
| 135 | 109.8070 | 24.7180 | 221.0 | 619.3 | 32.5 |
| 136 | 109.7914 | 24.6750 | 156.2 | 357.6 | 45.8 |
| 137 | 109.7543 | 24.6208 | 230.6 | 449.0 | 17.1 |
| 138 | 109.7183 | 24.6247 | 259.7 | 508.0 | 25.6 |
| 139 | 109.8300 | 24.6201 | 223.3 | 485.1 | 22.0 |
| 140 | 110.9172 | 23.4490 | 242.3 | 419.6 | 21.7 |
| 141 | 109.8272 | 24.7175 | 182.4 | 385.6 | 22.0 |
| 142 | 109.7583 | 24.7040 | 123.6 | 285.9 | 18.8 |
| 143 | 109.7324 | 24.7131 | 149.6 | 327.4 | 30.5 |
| 144 | 109.8460 | 24.7070 | 272.7 | 680.4 | 28.0 |
| 145 | 109.7493 | 24.6929 | 150.0 | 306.1 | 19.8 |
| 146 | 109.7503 | 24.6977 | 103.6 | 233.1 | 17.5 |
| 147 | 109.6861 | 24.6464 | 127.2 | 207.0 | 20.0 |
| 148 | 109.6951 | 24.6513 | 115.9 | 245.6 | 41.7 |
| 149 | 109.6910 | 24.6303 | 159.8 | 298.2 | 30.7 |
| 150 | 109.7153 | 24.6518 | 154.6 | 274.9 | 25.0 |
| 151 | 109.7150 | 24.6470 | 227.5 | 413.2 | 33.7 |
| 152 | 109.7043 | 24.6623 | 121.6 | 246.4 | 21.3 |
| 153 | 109.7032 | 24.6497 | 135.6 | 265.2 | 38.0 |
| 154 | 109.6985 | 24.6339 | 195.8 | 334.7 | 37.0 |
| 155 | 109.6732 | 24.6397 | 141.9 | 276.7 | 17.5 |
| 156 | 109.6526 | 24.6347 | 92.2  | 272.8 | 20.0 |
| 157 | 109.7572 | 24.7407 | 156.9 | 357.4 | 39.5 |
| 158 | 109.7777 | 24.7138 | 144.5 | 309.7 | 25.3 |
| 159 | 109.7776 | 24.7179 | 139.9 | 277.7 | 24.0 |
| 160 | 109.7842 | 24.7288 | 128.6 | 295.7 | 27.0 |
| 161 | 109.7615 | 24.7263 | 239.9 | 462.1 | 32.7 |
| 162 | 109.8014 | 24.7366 | 196.8 | 599.9 | 65.0 |
| 163 | 109.7866 | 24.7515 | 414.7 | 663.3 | 26.7 |
| 164 | 109.7420 | 24.7596 | 404.7 | 608.3 | 23.0 |
| 165 | 109.7716 | 24.7376 | 326.4 | 474.2 | 28.5 |
| 166 | 109.7759 | 24.7285 | 122.2 | 322.9 | 29.0 |
| 167 | 109.7370 | 24.7496 | 143.8 | 422.4 | 45.0 |
| 168 | 109.7678 | 24.7590 | 220.0 | 538.2 | 44.0 |
| 169 | 109.6663 | 24.6428 | 311.0 | 456.3 | 35.0 |
| 170 | 109.7765 | 24.7529 | 113.0 | 267.4 | 17.0 |
| 171 | 109.9726 | 24.7969 | 345.8 | 828.9 | 81.0 |
| 172 | 109.9647 | 24.7530 | 323.6 | 638.2 | 39.0 |
| 173 | 109.9472 | 24.7469 | 219.3 | 488.4 | 31.0 |
| 174 | 109.9243 | 24.7397 | 219.3 | 520.0 | 36.8 |

|     |          |         |       |       |      |
|-----|----------|---------|-------|-------|------|
| 175 | 109.9211 | 24.6953 | 216.6 | 465.6 | 30.3 |
| 176 | 110.1159 | 24.5657 | 355.9 | 643.2 | 36.8 |
| 177 | 109.9212 | 24.6538 | 310.6 | 693.3 | 43.9 |
| 178 | 110.1361 | 24.6575 | 144.6 | 375.4 | 32.8 |
| 179 | 110.1162 | 24.6576 | 103.2 | 228.3 | 16.0 |
| 180 | 110.1667 | 24.7368 | 279.7 | 480.2 | 30.0 |
| 181 | 110.1656 | 24.7203 | 172.7 | 356.1 | 34.5 |
| 182 | 110.1545 | 24.6972 | 338.6 | 508.6 | 28.5 |
| 183 | 110.1416 | 24.6952 | 276.6 | 493.9 | 16.0 |
| 184 | 110.1576 | 24.7111 | 98.4  | 282.0 | 23.0 |
| 185 | 110.0852 | 24.6826 | 303.8 | 488.1 | 22.5 |
| 186 | 110.0917 | 24.6644 | 277.8 | 611.4 | 38.0 |
| 187 | 110.1021 | 24.6708 | 323.3 | 539.1 | 27.0 |
| 188 | 110.1121 | 24.6650 | 279.0 | 489.0 | 30.0 |
| 189 | 110.1340 | 24.6763 | 422.8 | 678.4 | 28.0 |
| 190 | 110.1247 | 24.6672 | 321.0 | 521.3 | 35.0 |
| 191 | 110.1186 | 24.6683 | 300.4 | 598.7 | 42.0 |
| 192 | 110.1142 | 24.7011 | 124.7 | 247.0 | 21.3 |
| 193 | 110.1992 | 24.5551 | 183.6 | 491.8 | 31.0 |
| 194 | 110.2400 | 24.5742 | 209.1 | 437.8 | 29.5 |
| 195 | 110.3671 | 24.5688 | 212.4 | 372.0 | 22.8 |
| 196 | 110.3892 | 24.5524 | 142.4 | 440.0 | 28.0 |
| 197 | 110.6173 | 24.9403 | 346.9 | 915.5 | 60.0 |
| 198 | 110.6761 | 24.8511 | 78.8  | 242.6 | 25.0 |
| 199 | 110.9935 | 24.9487 | 181.1 | 378.6 | 29.0 |
| 200 | 110.8558 | 24.6174 | 309.6 | 692.6 | 59.8 |
| 201 | 110.9384 | 24.8138 | 141.5 | 308.3 | 24.0 |
| 202 | 109.8924 | 25.6518 | 385.3 | 843.0 | 56.3 |
| 203 | 109.7393 | 25.5626 | 252.3 | 543.9 | 60.0 |
| 204 | 110.8508 | 24.7180 | 431.9 | 950.9 | 75.5 |
| 205 | 109.8563 | 25.1586 | 410.5 | 925.9 | 64.8 |
| 206 | 109.6720 | 25.2057 | 152.1 | 375.6 | 37.5 |
| 207 | 109.6848 | 25.3138 | 348.8 | 880.6 | 79.5 |
| 208 | 109.6918 | 25.3316 | 148.3 | 426.2 | 44.3 |
| 209 | 109.7740 | 25.3948 | 340.6 | 788.7 | 66.3 |
| 210 | 109.7272 | 25.4049 | 325.0 | 731.0 | 66.8 |
| 211 | 109.7821 | 25.3694 | 464.3 | 848.1 | 66.8 |
| 212 | 109.7481 | 25.5491 | 217.7 | 539.5 | 37.3 |
| 213 | 109.6715 | 24.9361 | 227.2 | 406.1 | 35.3 |
| 214 | 109.7313 | 24.8549 | 72.8  | 252.5 | 25.1 |
| 215 | 109.9091 | 25.5590 | 58.0  | 205.4 | 19.5 |
| 216 | 109.9488 | 25.2886 | 312.4 | 803.1 | 56.3 |
| 217 | 109.9726 | 25.2944 | 287.0 | 706.5 | 70.5 |
| 218 | 109.9787 | 25.2905 | 102.7 | 282.5 | 34.5 |

|     |          |         |       |        |      |
|-----|----------|---------|-------|--------|------|
| 219 | 110.0450 | 25.2993 | 368.1 | 869.2  | 63.5 |
| 220 | 110.1132 | 25.3111 | 531.9 | 1031.1 | 76.3 |
| 221 | 110.2342 | 25.2442 | 488.8 | 787.4  | 53.0 |
| 222 | 110.2798 | 25.2534 | 98.7  | 276.2  | 28.3 |
| 223 | 110.2945 | 25.2137 | 109.0 | 266.0  | 20.0 |
| 224 | 110.3010 | 25.1832 | 440.6 | 808.0  | 45.8 |
| 225 | 110.3239 | 25.1722 | 377.6 | 604.2  | 40.3 |
| 226 | 110.3514 | 25.1607 | 125.9 | 324.6  | 32.5 |
| 227 | 110.3535 | 25.1656 | 118.8 | 382.0  | 33.3 |
| 228 | 110.4332 | 25.1588 | 220.2 | 381.0  | 27.1 |
| 229 | 110.4305 | 25.1555 | 227.9 | 407.5  | 25.0 |
| 230 | 110.4407 | 25.0831 | 356.0 | 769.4  | 71.5 |
| 231 | 110.3131 | 25.1173 | 315.0 | 467.9  | 19.5 |
| 232 | 110.5588 | 25.2667 | 255.4 | 659.2  | 56.3 |
| 233 | 110.5723 | 25.2816 | 202.0 | 373.6  | 29.7 |
| 234 | 110.4598 | 25.1876 | 208.4 | 372.2  | 25.4 |
| 235 | 110.5076 | 25.1731 | 258.1 | 496.5  | 66.7 |
| 236 | 110.5409 | 25.1628 | 364.4 | 556.7  | 31.0 |
| 237 | 110.5376 | 25.1387 | 311.8 | 758.5  | 87.5 |
| 238 | 110.4639 | 25.0753 | 240.2 | 583.9  | 65.3 |
| 239 | 110.6840 | 25.2742 | 406.2 | 788.0  | 54.8 |
| 240 | 110.6776 | 25.2223 | 452.8 | 842.6  | 44.6 |
| 241 | 110.8059 | 25.3201 | 440.1 | 812.2  | 52.8 |
| 242 | 110.9003 | 25.3581 | 538.7 | 1092.5 | 90.8 |
| 243 | 110.9616 | 25.3208 | 335.8 | 626.6  | 30.8 |
| 244 | 109.8905 | 24.7660 | 208.2 | 407.8  | 19.3 |
| 245 | 110.8267 | 24.0952 | 172.9 | 513.6  | 45.3 |
| 246 | 110.9614 | 23.8448 | 327.6 | 513.9  | 34.3 |
| 247 | 110.8706 | 23.8429 | 286.1 | 578.5  | 41.0 |
| 248 | 110.8785 | 23.8968 | 318.5 | 570.3  | 30.5 |
| 249 | 110.8074 | 23.9841 | 137.3 | 331.7  | 33.0 |
| 250 | 110.8049 | 23.9786 | 119.5 | 254.4  | 21.5 |
| 251 | 110.8090 | 23.9725 | 124.3 | 268.4  | 24.4 |
| 252 | 110.7827 | 23.9954 | 304.0 | 540.6  | 40.7 |
| 253 | 110.7844 | 23.9891 | 395.5 | 684.1  | 47.5 |
| 254 | 110.8019 | 23.9896 | 170.6 | 389.2  | 31.5 |
| 255 | 110.7883 | 23.9830 | 81.6  | 198.6  | 14.0 |
| 256 | 110.7751 | 23.9861 | 261.6 | 424.7  | 25.3 |
| 257 | 110.8108 | 23.9673 | 198.9 | 311.7  | 11.7 |
| 258 | 110.8476 | 23.8617 | 418.8 | 669.4  | 22.3 |
| 259 | 110.2310 | 23.3587 | 142.5 | 307.5  | 38.0 |
| 260 | 110.2508 | 23.3220 | 178.8 | 386.9  | 40.0 |
| 261 | 110.2641 | 23.3317 | 510.7 | 831.0  | 32.0 |
| 262 | 110.4158 | 23.5440 | 95.7  | 231.9  | 34.0 |

|     |          |         |       |       |      |
|-----|----------|---------|-------|-------|------|
| 263 | 110.4178 | 23.5245 | 215.8 | 437.2 | 41.7 |
| 264 | 110.4235 | 23.4799 | 329.1 | 564.9 | 19.5 |
| 265 | 109.6531 | 24.0554 | 190.2 | 337.1 | 22.3 |
| 266 | 109.8643 | 24.3130 | 215.6 | 455.8 | 40.7 |
| 267 | 110.3485 | 24.2346 | 102.6 | 213.7 | 21.0 |
| 268 | 110.3440 | 24.2381 | 166.6 | 295.9 | 37.5 |
| 269 | 110.3367 | 24.2256 | 127.1 | 274.9 | 23.5 |
| 270 | 110.3548 | 24.2341 | 69.9  | 178.9 | 15.7 |
| 271 | 110.3445 | 24.2429 | 176.0 | 296.0 | 38.5 |
| 272 | 110.3387 | 24.2305 | 468.7 | 676.7 | 33.0 |

---

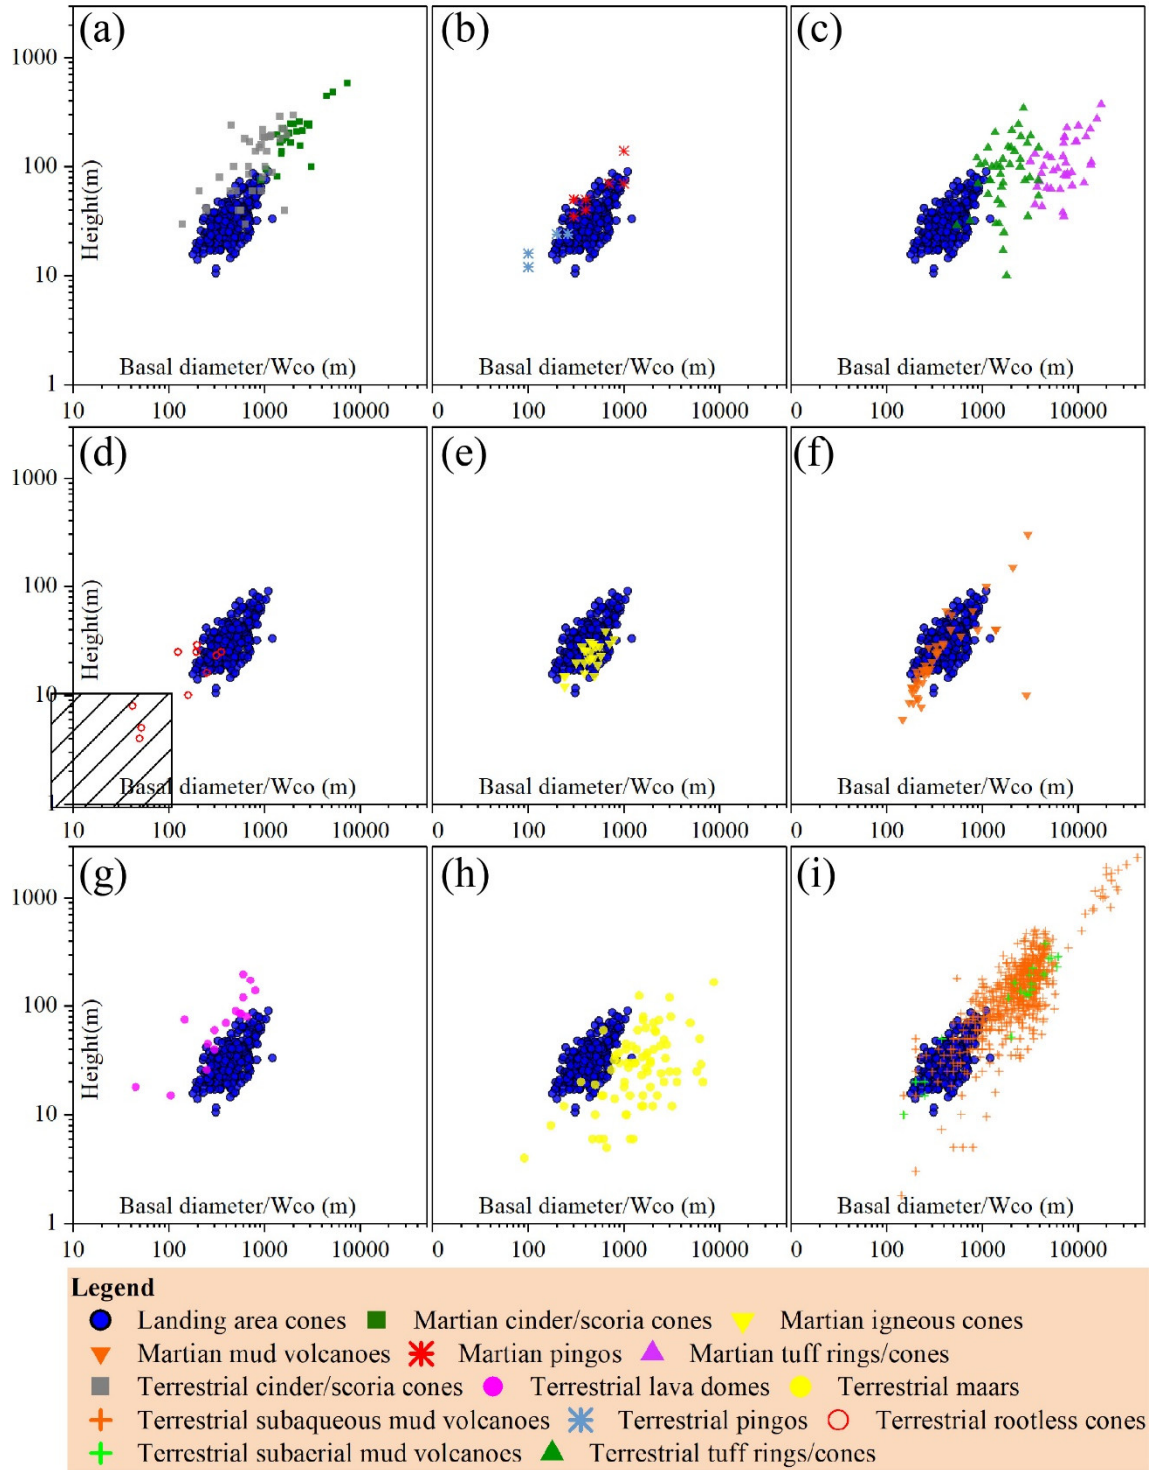

**Figure S1.** Separate panels of Figure 5. (a) Landing area cones versus cinder/scoria cones on Earth and Mars. (b) Landing area cones versus pingos on Earth and Mars. (c) Landing area cones versus tuff rings/cones on Earth and Mars. (d) Landing area cones versus rootless cones on Earth and Mars, the bottom left rectangle with filled diagonals represents Martian rootless cones. (e) Landing area cones versus Martian igneous cones. (f) Landing area cones versus Martian mud volcanoes. (g) Landing area cones versus terrestrial lava domes. (h) Landing area cones versus terrestrial maars. (i) Landing area cones versus subaqueous/subaerial mud volcanoes on Earth.

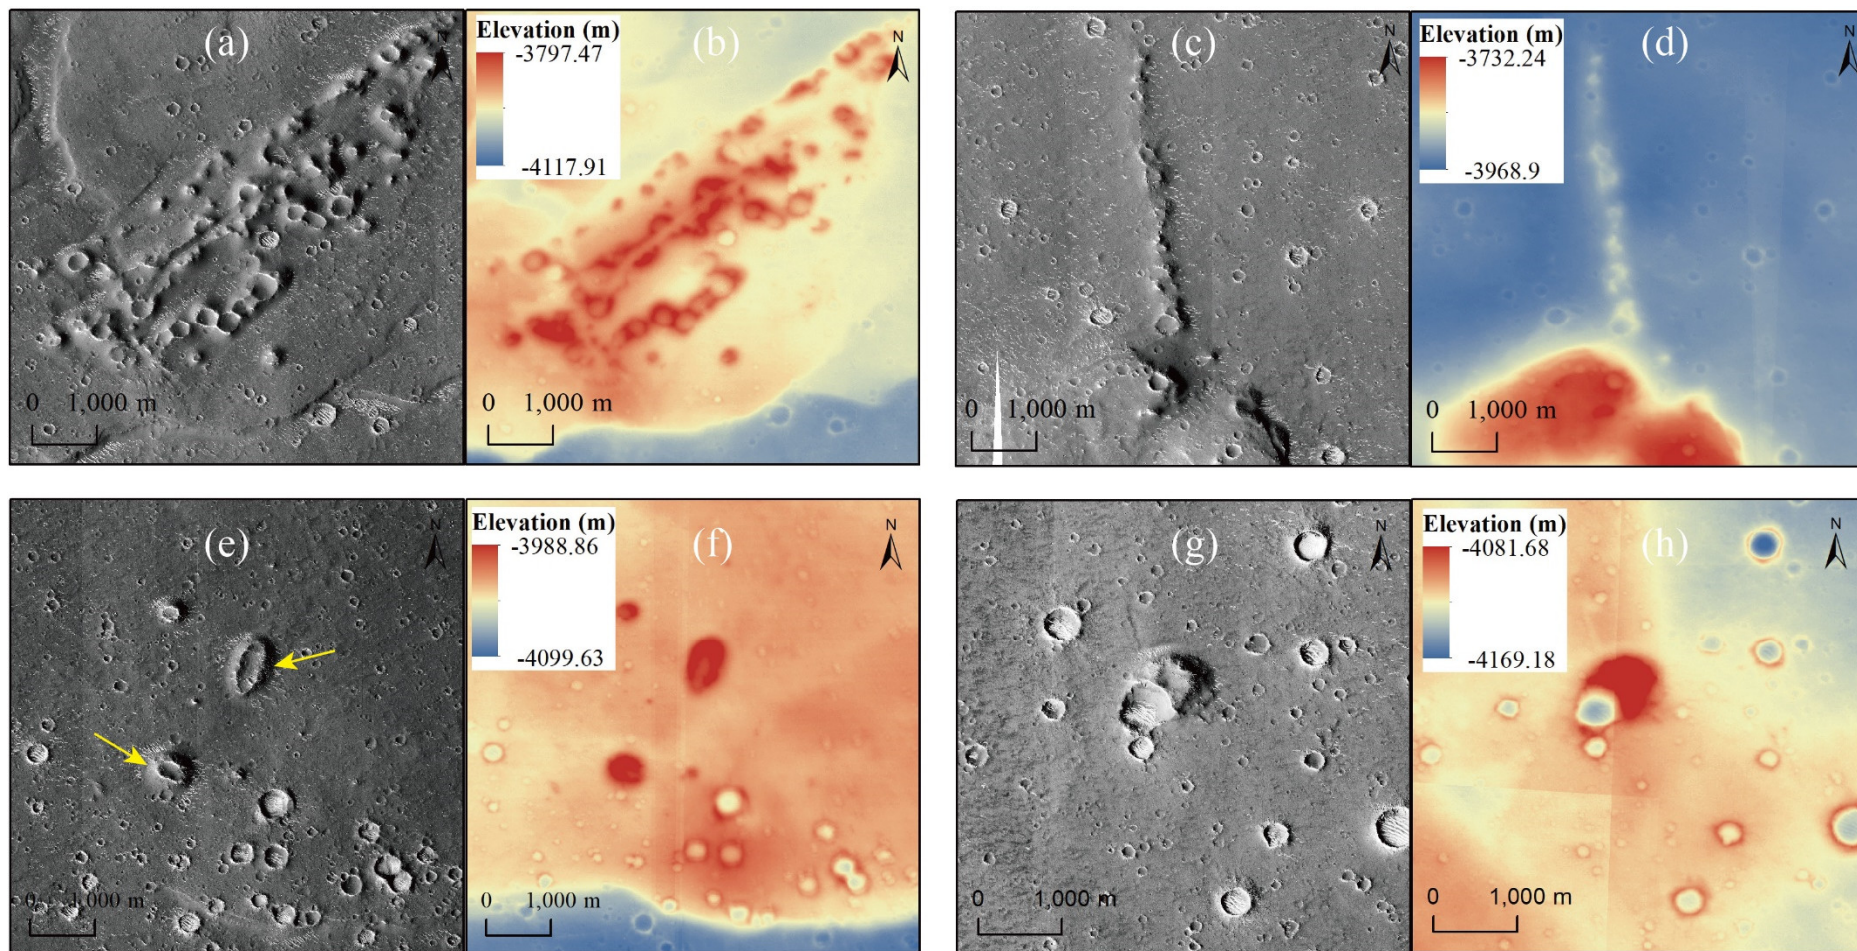

**Figure S2.** The images of the landing area cones with various morphology from HiRIC DOM and DEM. (a) a cone cluster, (c) a cone chain, (e) elongated cones (denoted by yellow arrows), (g) a cone destroyed by a crater. Their topographies are shown in (b), (d), (f) and (h), respectively.
